# Supplementary material for: Attributing correlation skill of dynamical GCM precipitation forecasts to statistical ENSO teleconnection using a set-theory-based approach
Source: Copernicus journal article supplement (doi:10.5194/hess-25-5717-2021), 2021-11-08
Supplement: Supplementary file 1 [file hess-25-5717-2021-supplement.pdf]

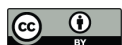

*Supplement of*

**Attributing correlation skill of dynamical GCM precipitation forecasts to statistical ENSO teleconnection using a set-theory-based approach**

**Tongtiegang Zhao et al.**

*Correspondence to:* Tongtiegang Zhao (zhaottg@mail.sysu.edu.cn)

The copyright of individual parts of the supplement might differ from the article licence.

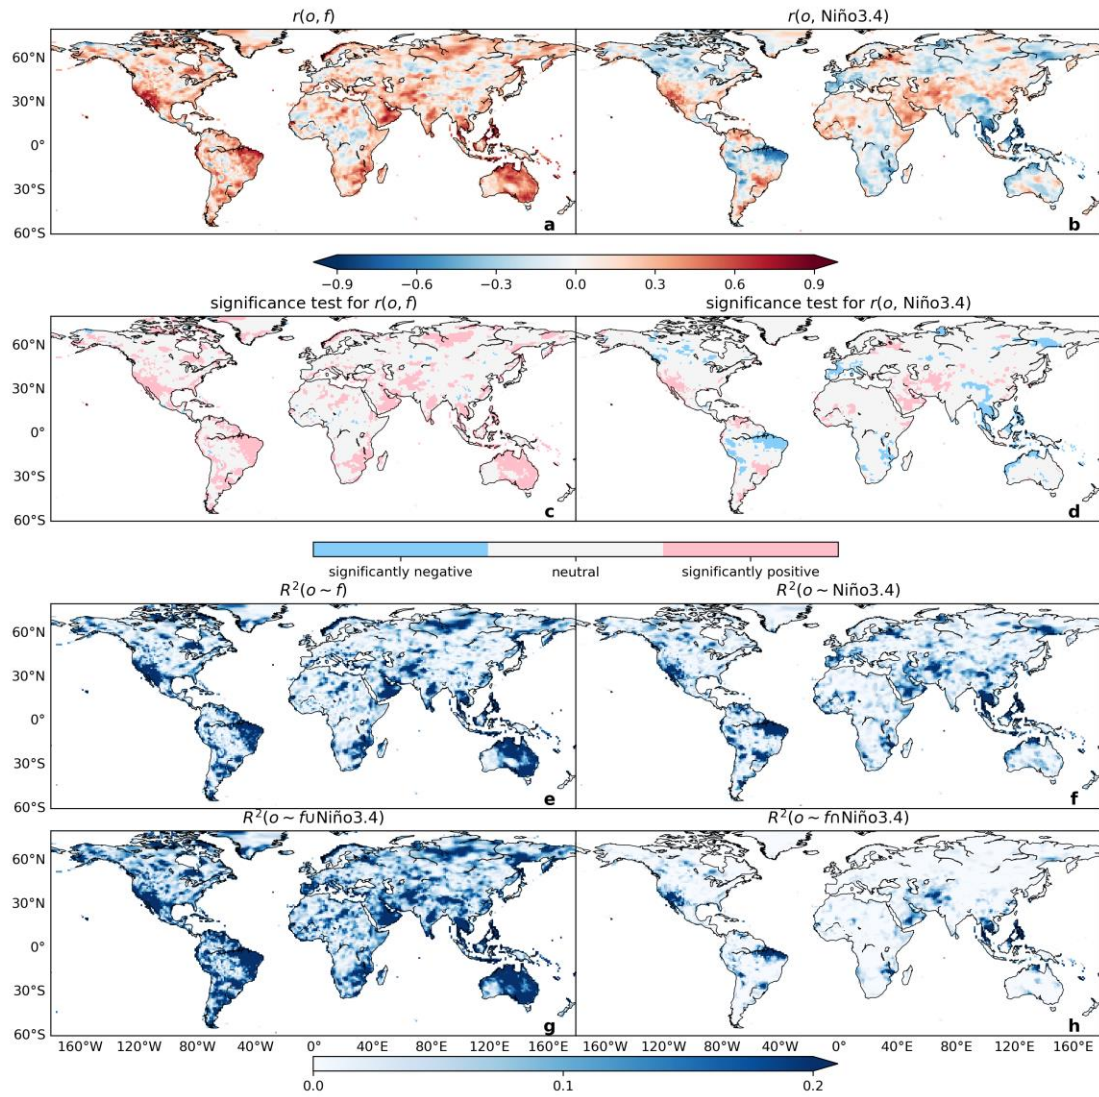

Figure S1: As in Figure 4 but for MAM seasonal precipitation forecasts generated in March.

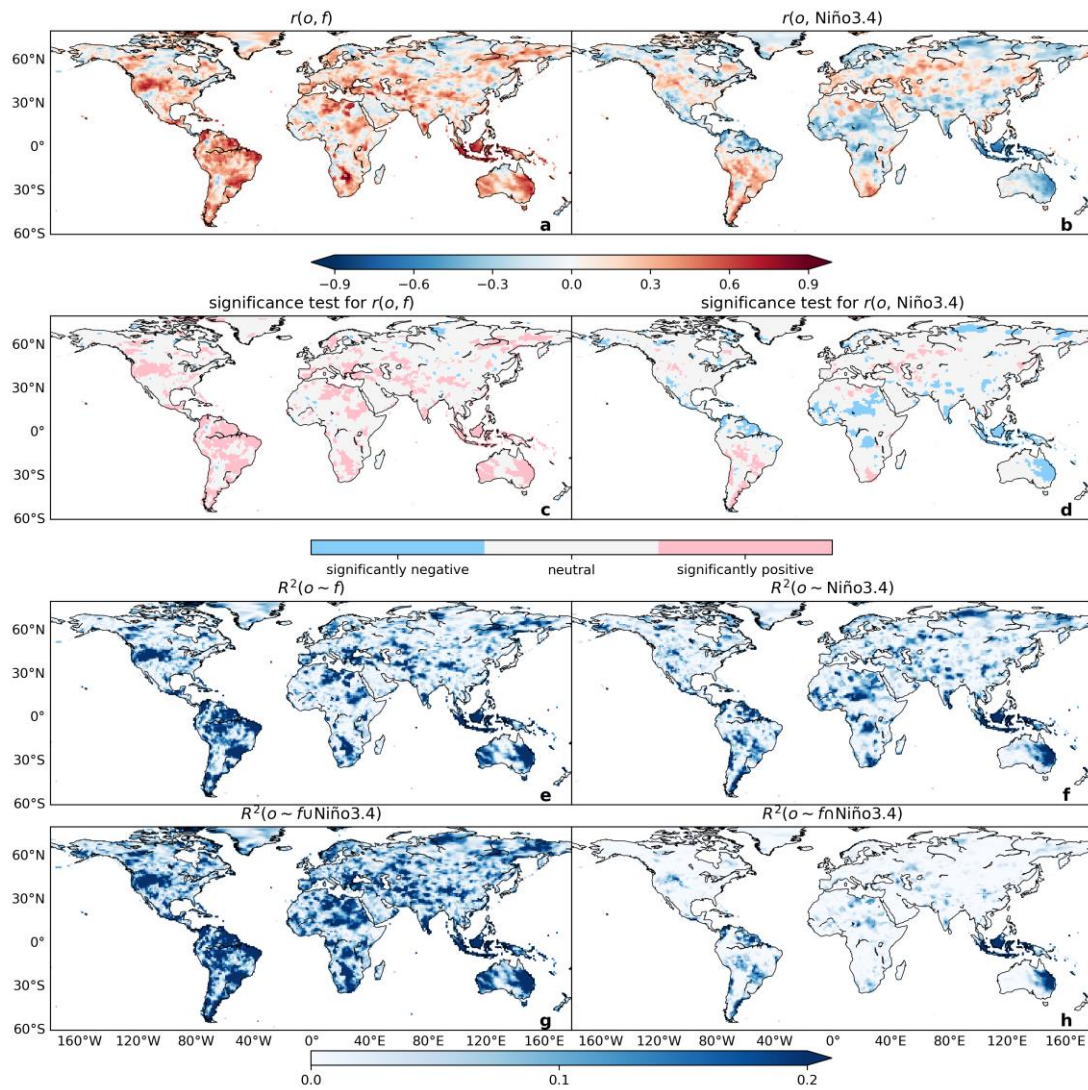

5

6 Figure S2: As in Figure 4 but for JJA seasonal precipitation forecasts generated in June.

7

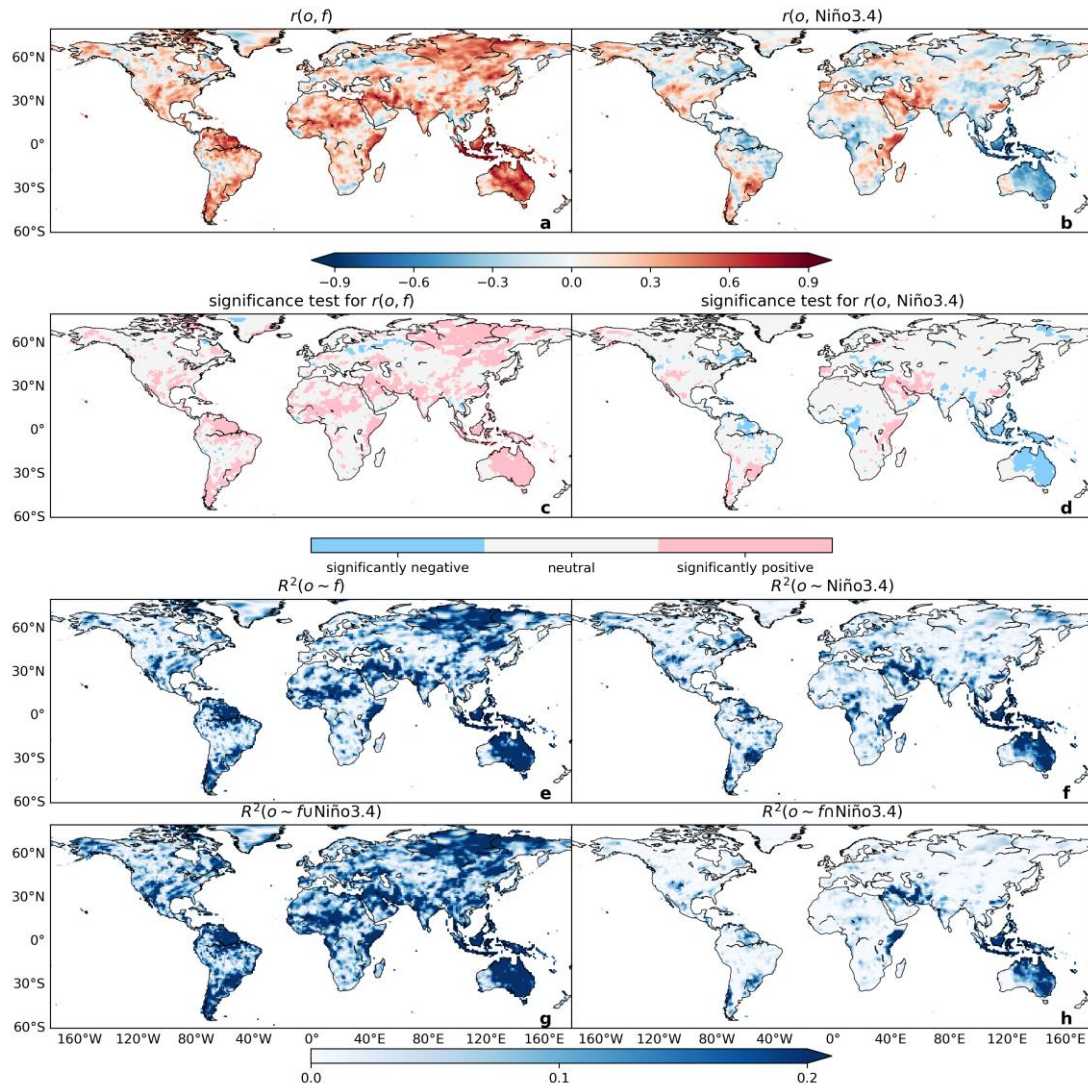

8

9 Figure S3: As in Figure 4 but for SON seasonal precipitation forecasts generated in  
 10 September.

11



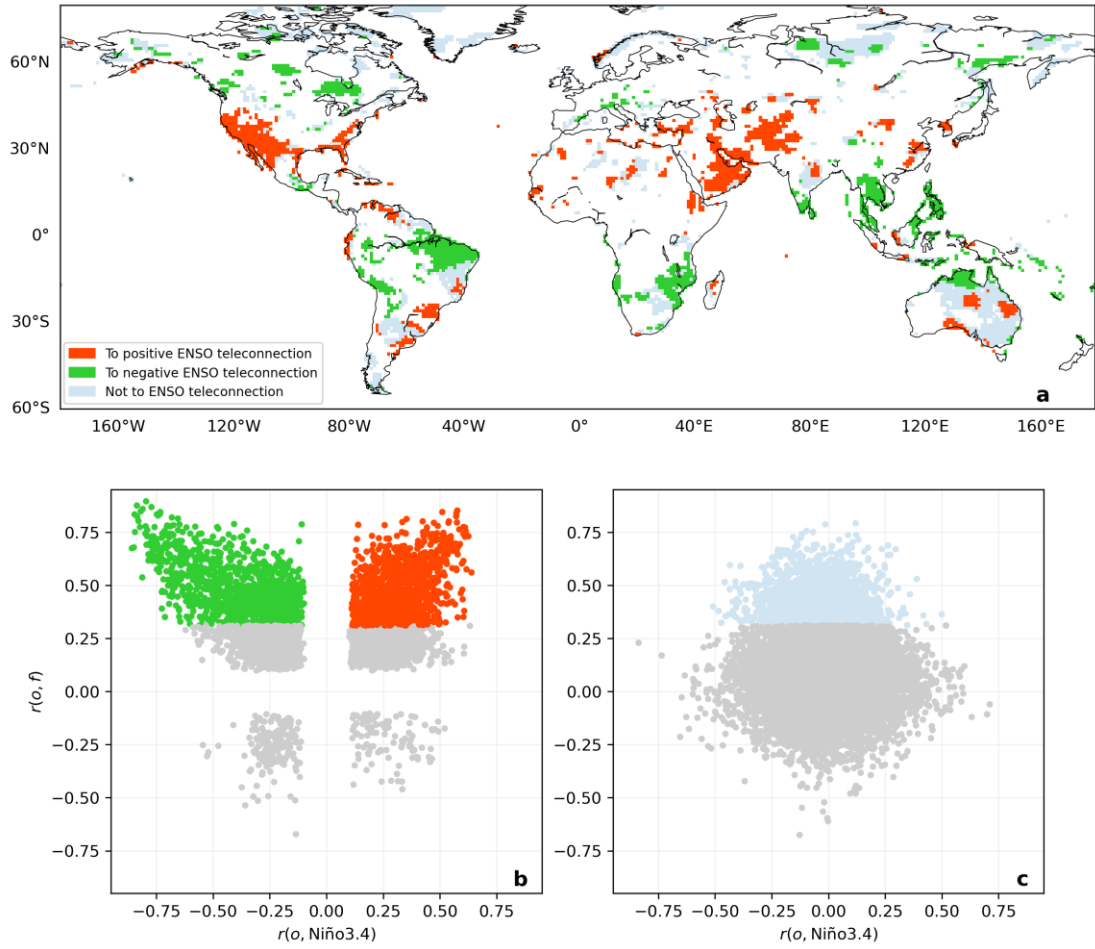

Figure S4: As in Figure 6 but for MAM seasonal precipitation forecasts generated in March.

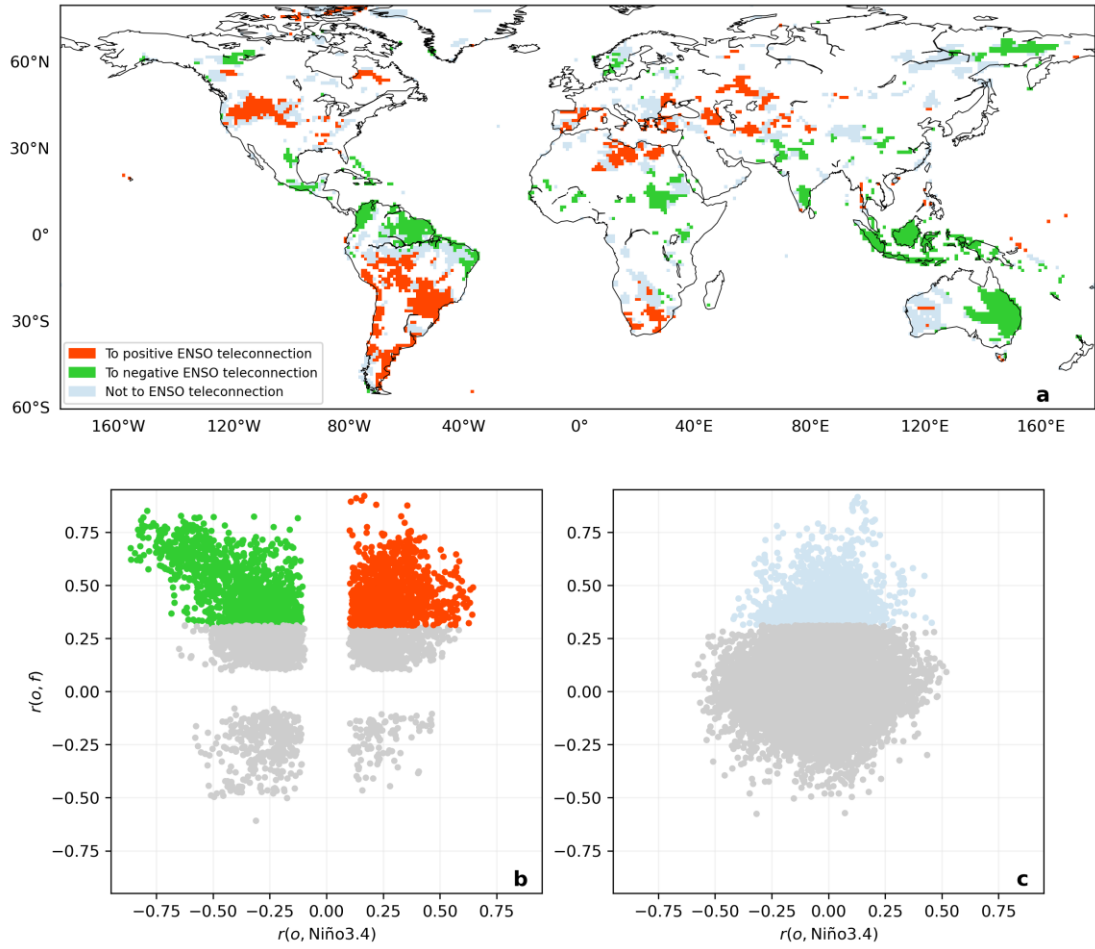

16

17 Figure S5: As in Figure 6 but for JJA seasonal precipitation forecasts generated in June.

18

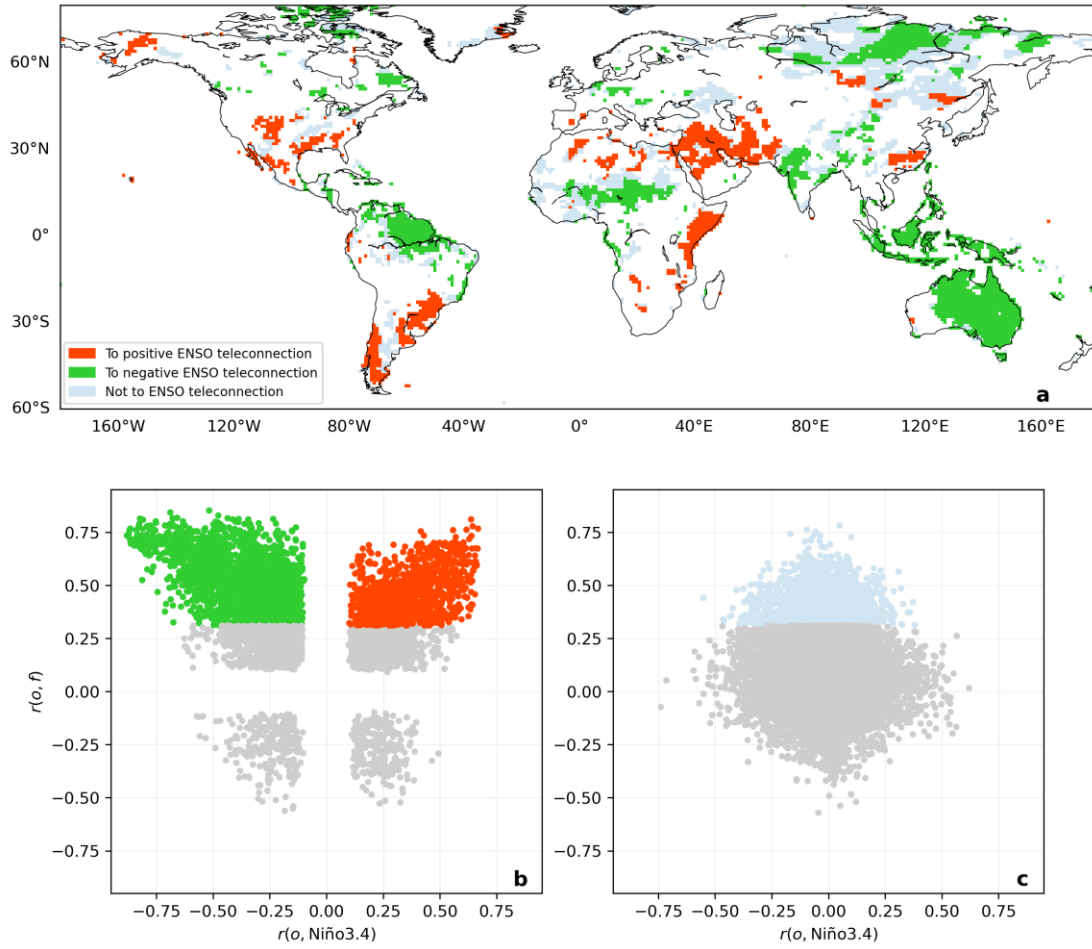

19

20 Figure S6: As in Figure 6 but for SON seasonal precipitation forecasts generated in  
 21 September.

22

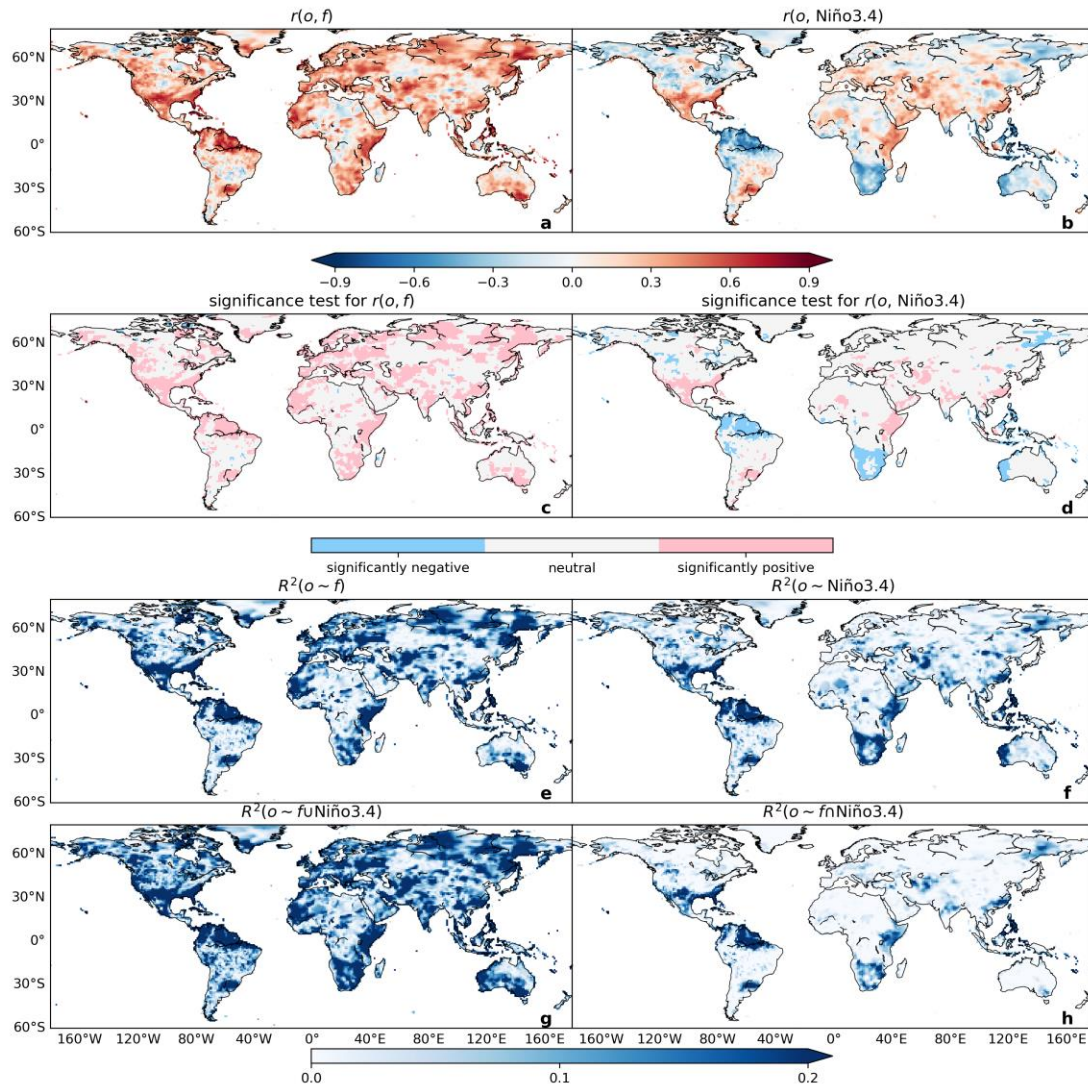

Figure S7: As in Figure 4 but for November (1-month lag) Niño3.4 index.



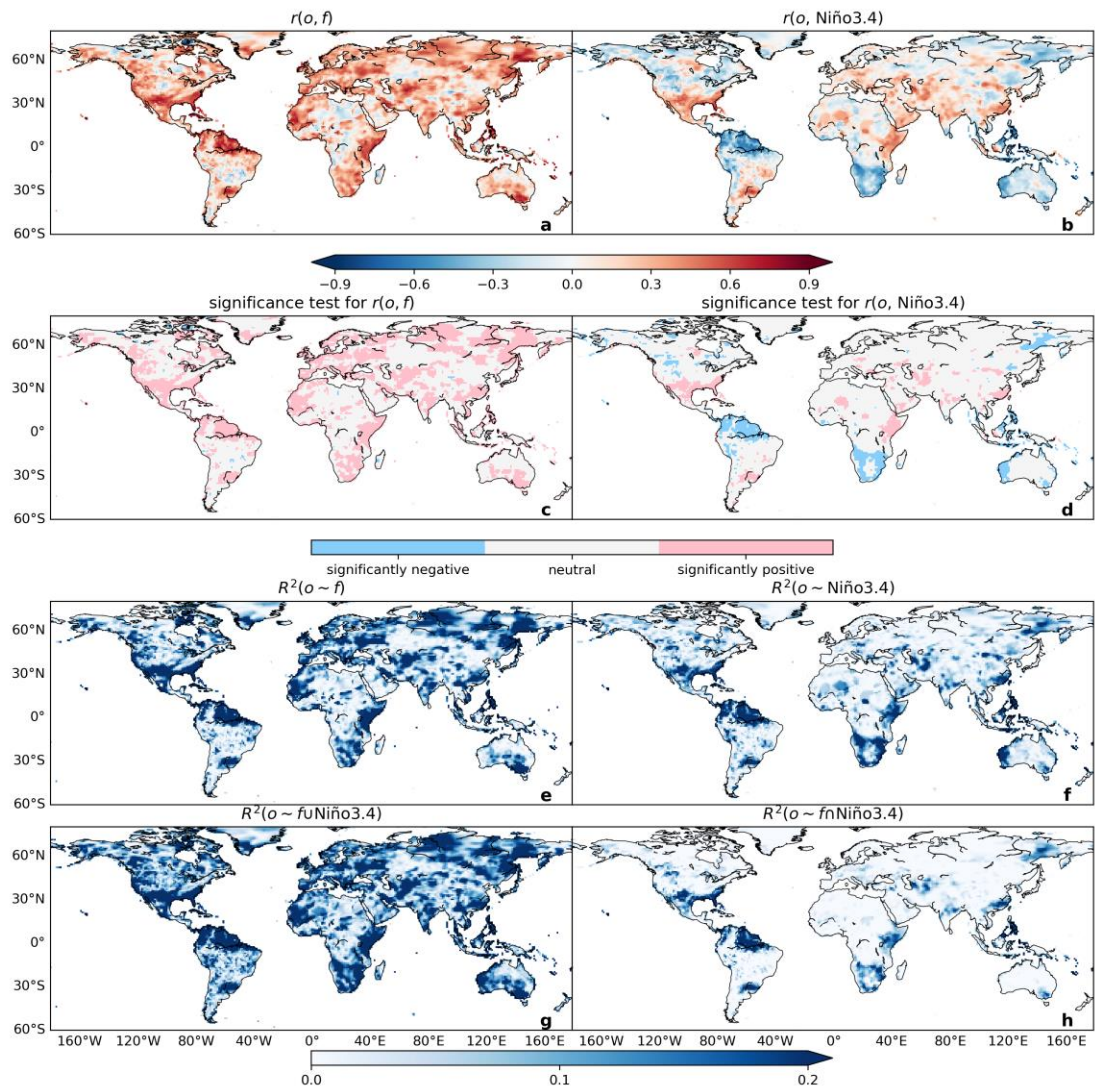

26

27 Figure S8: As in Figure 4 but for October (2-month lag) Niño3.4 index.

28

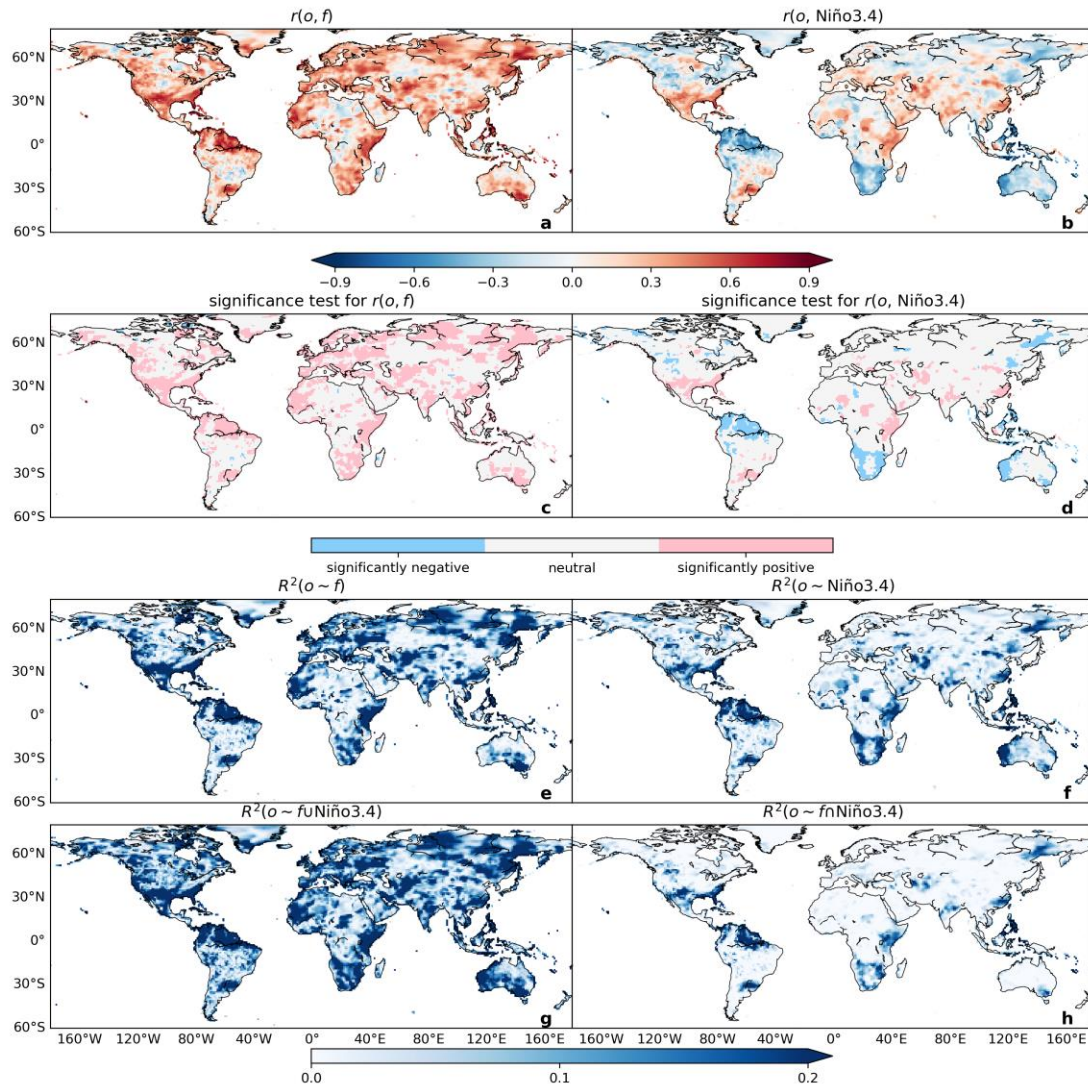

29

30 Figure S9: As in Figure 4 but for September (3-month lag) Niño3.4 index.

31

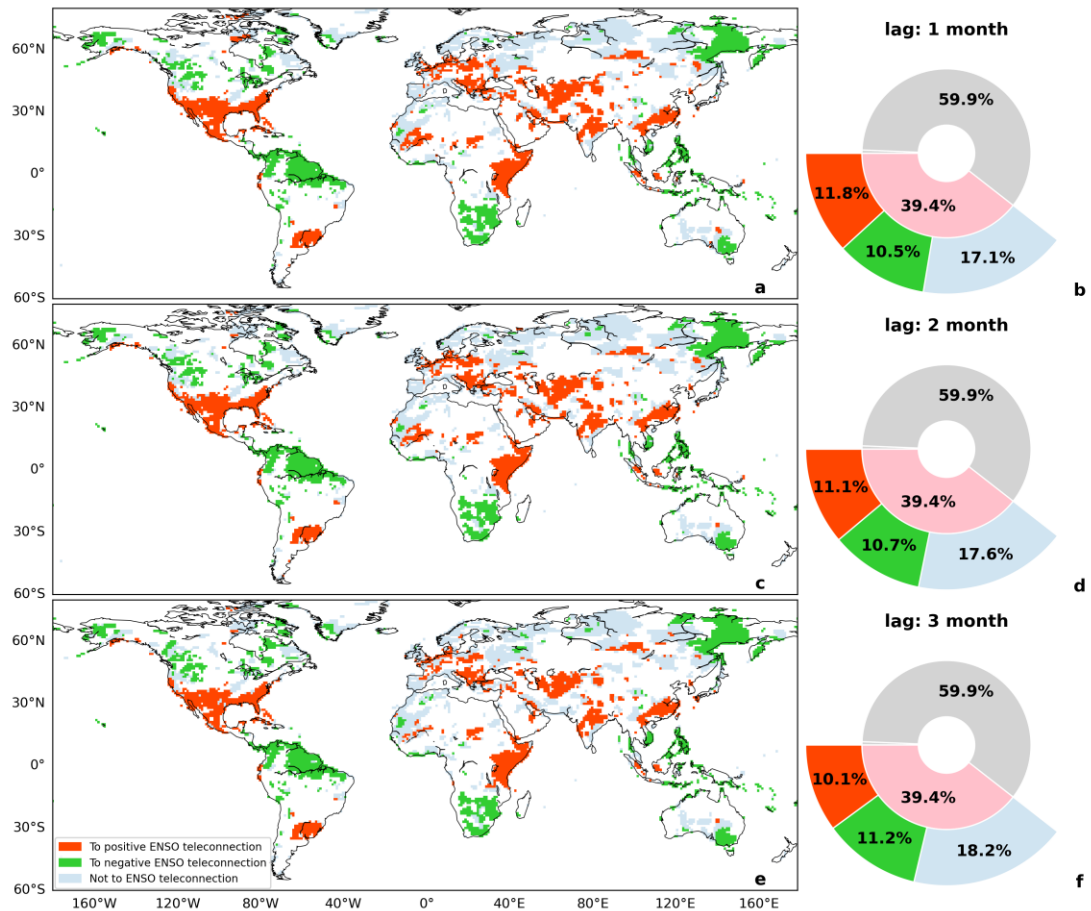

Figure S10: As in Figure 9 but for DJF seasonal precipitation with (a-b) November (1-month lag), (c-d) October (2-month lag) and (e-f) September (3-month lag) Niño3.4 index.



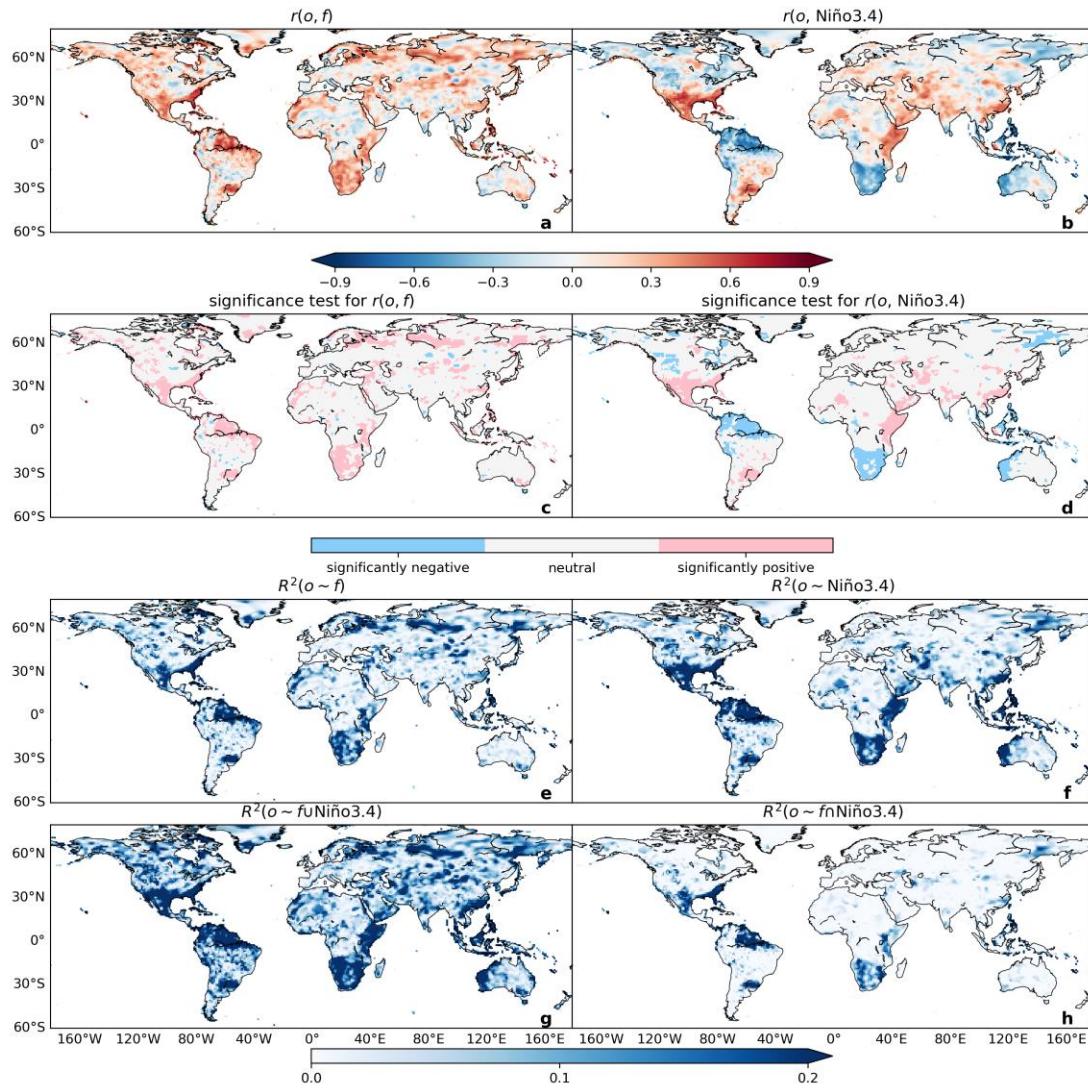

Figure S11: As in Figure 4 but for DJF seasonal precipitation forecasts generated in November (1-month lead).

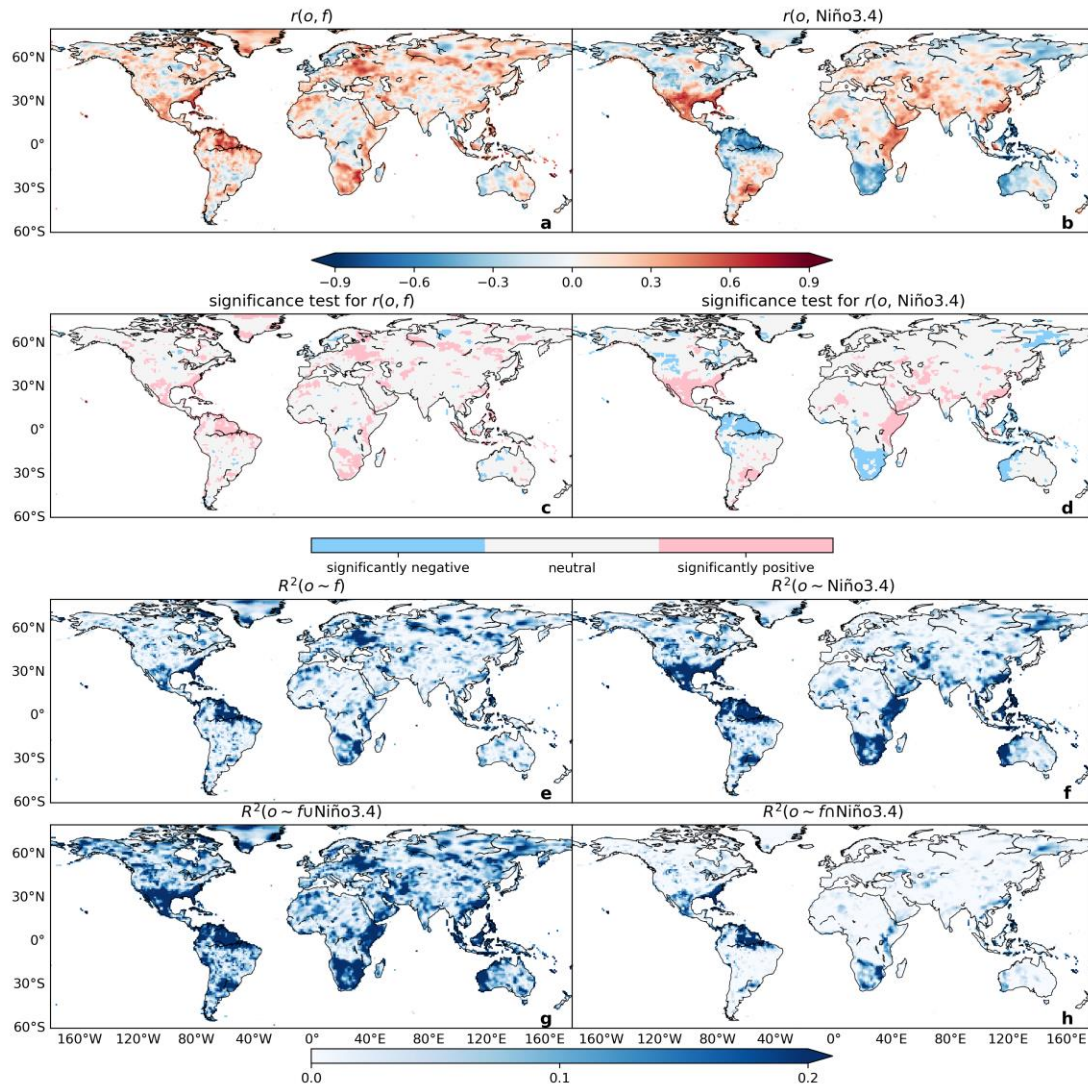

Figure S12: As in Figure 4 but for DJF seasonal precipitation forecasts generated in October (2-month lead).



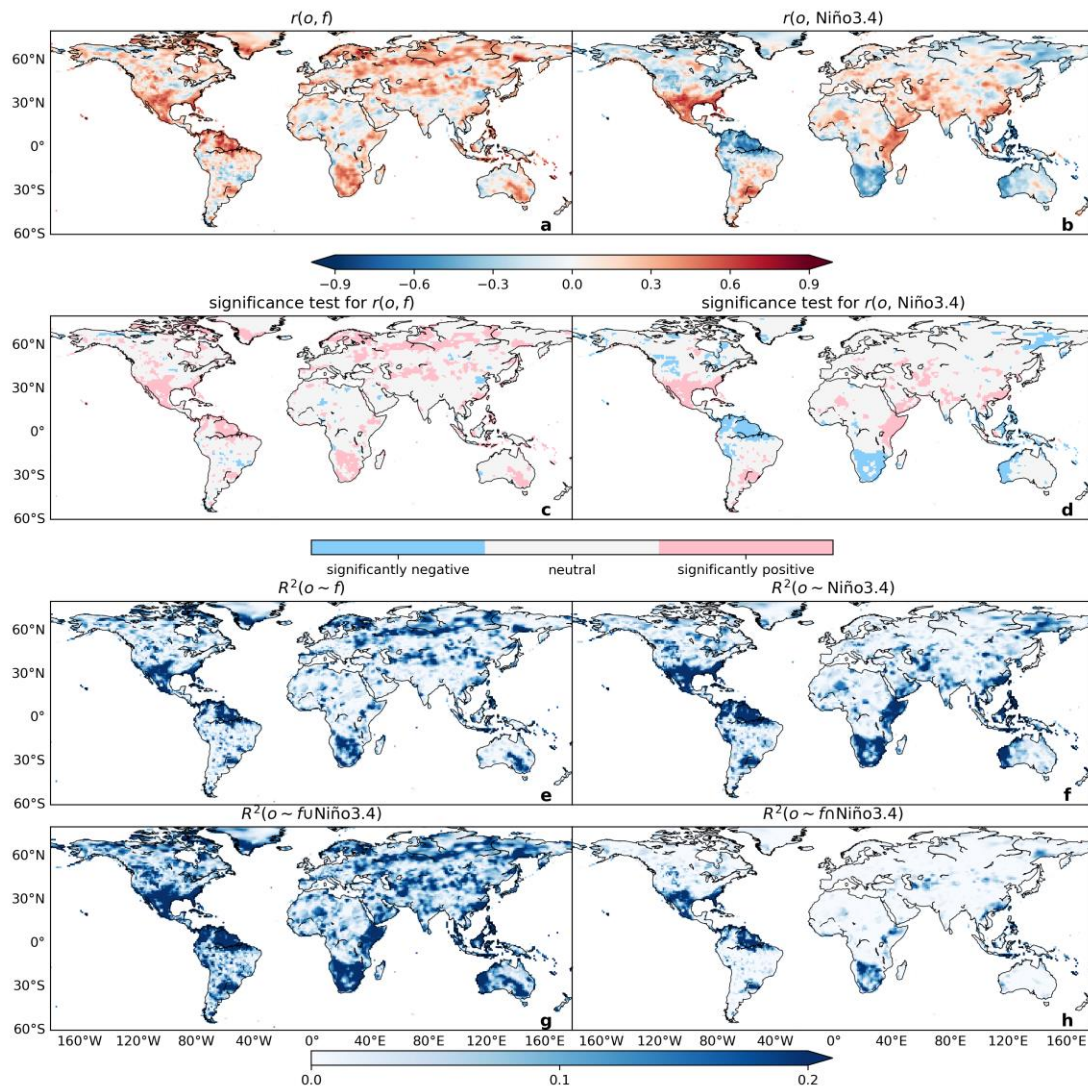

Figure S13: As in Figure 4 but for DJF seasonal precipitation forecasts generated in September (3-month lead).

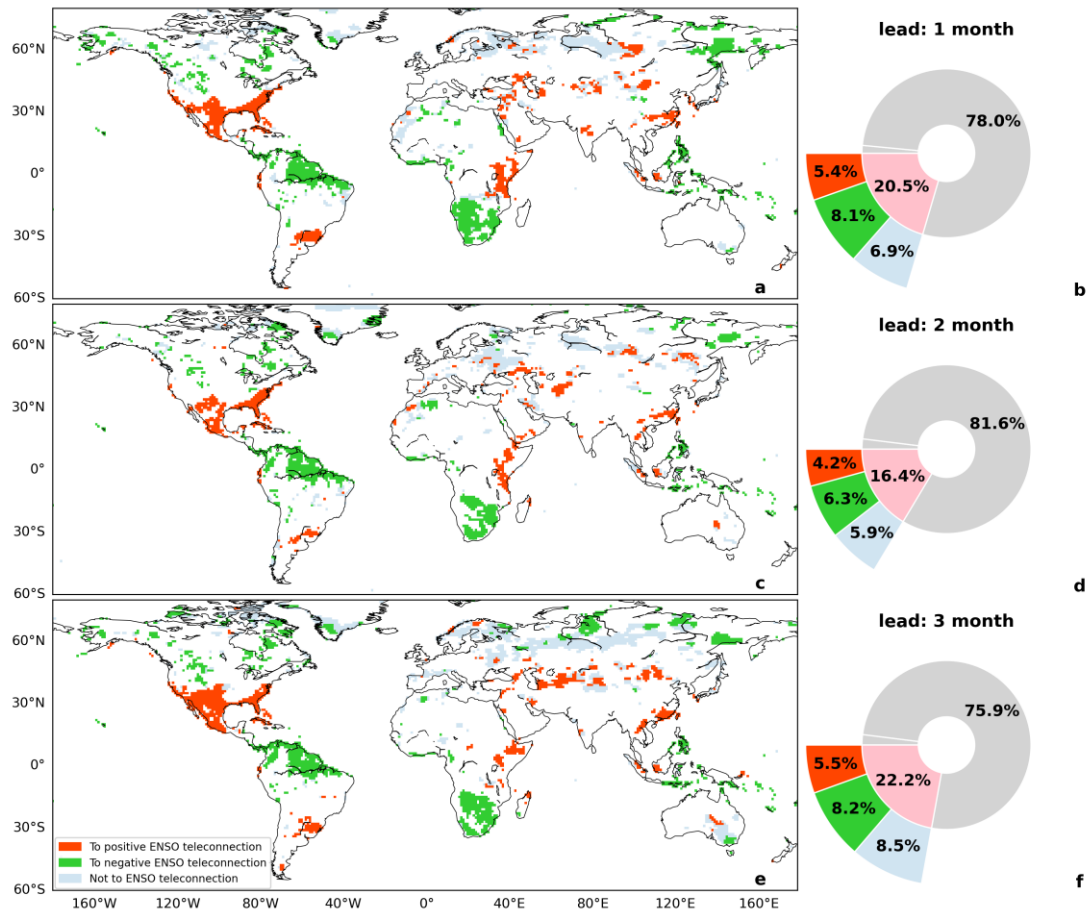

Figure S14: As in Figure 9 but for DJF seasonal forecasts generated in (a-b) November (1-month lead), (c-d) October (2-month lead) and (e-f) September (3-month lead).
